# Supplementary figures and images for: Understanding the issues in monitoring the treatment effectiveness of constructed wetlands in urban areas – a case study in greater Melbourne, Australia
Source: Royal Society of Chemistry journal article supplement (doi:10.1039/d1ew00099c), 2021-01-01

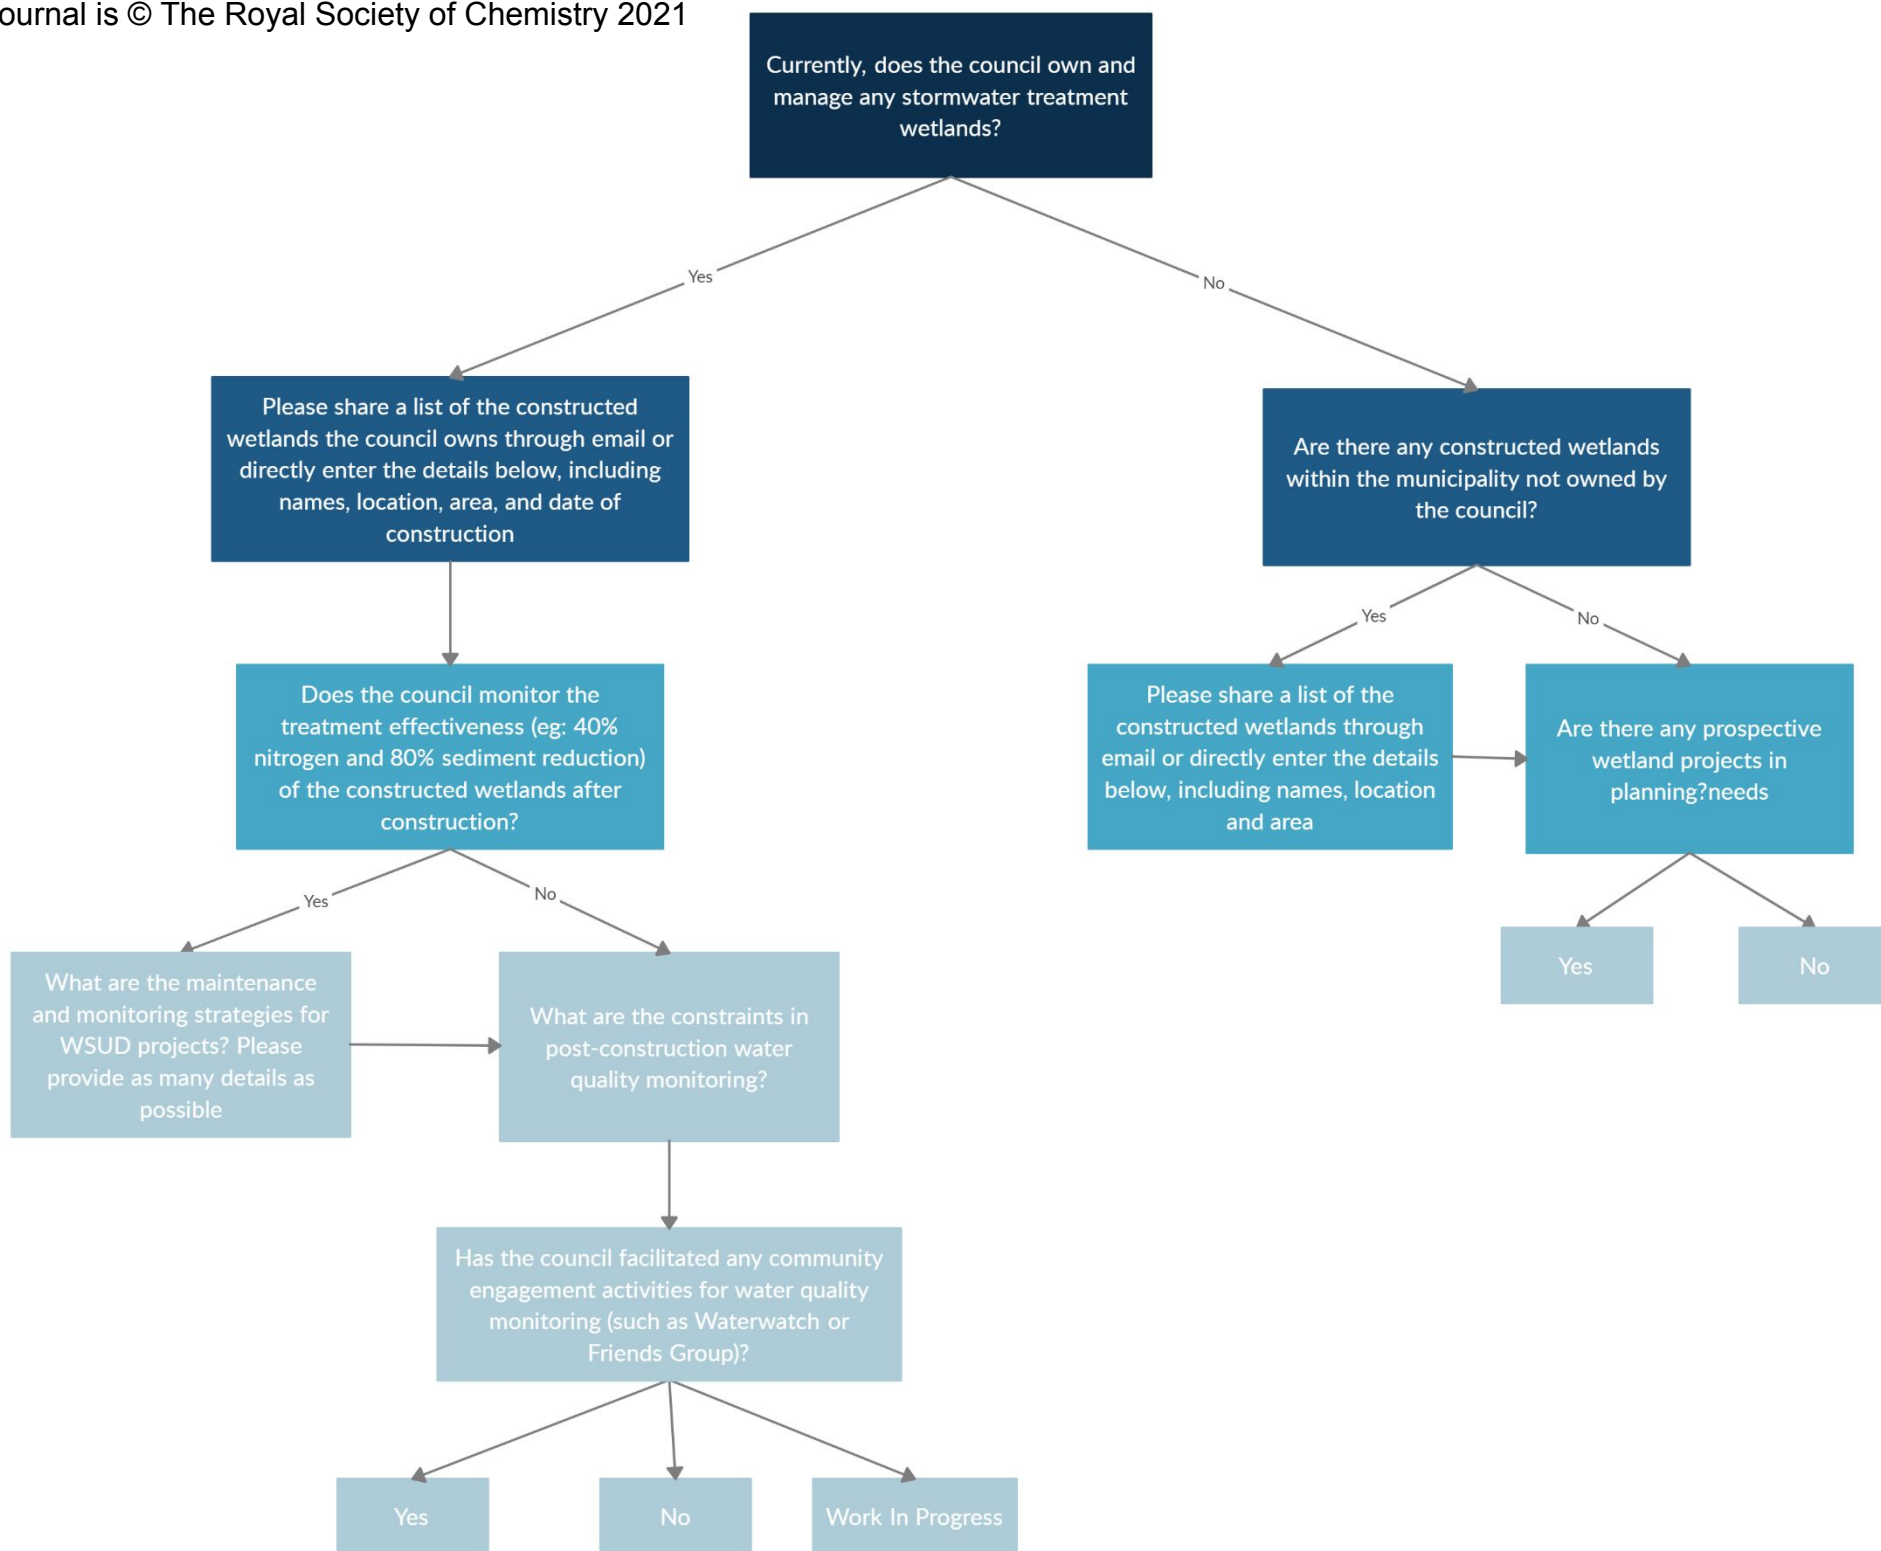

Supplement: d1ew00099c1.pdf [file d1ew00099c1.pdf]
